# Supplementary material for: Contribution of phytochelatins to cadmium tolerance in peanut plants
Source: Royal Society of Chemistry journal article supplement (doi:10.1039/c2mt20146a), 2012-01-01
Supplement: c2mt20146a.pdf [file c2mt20146a.pdf]

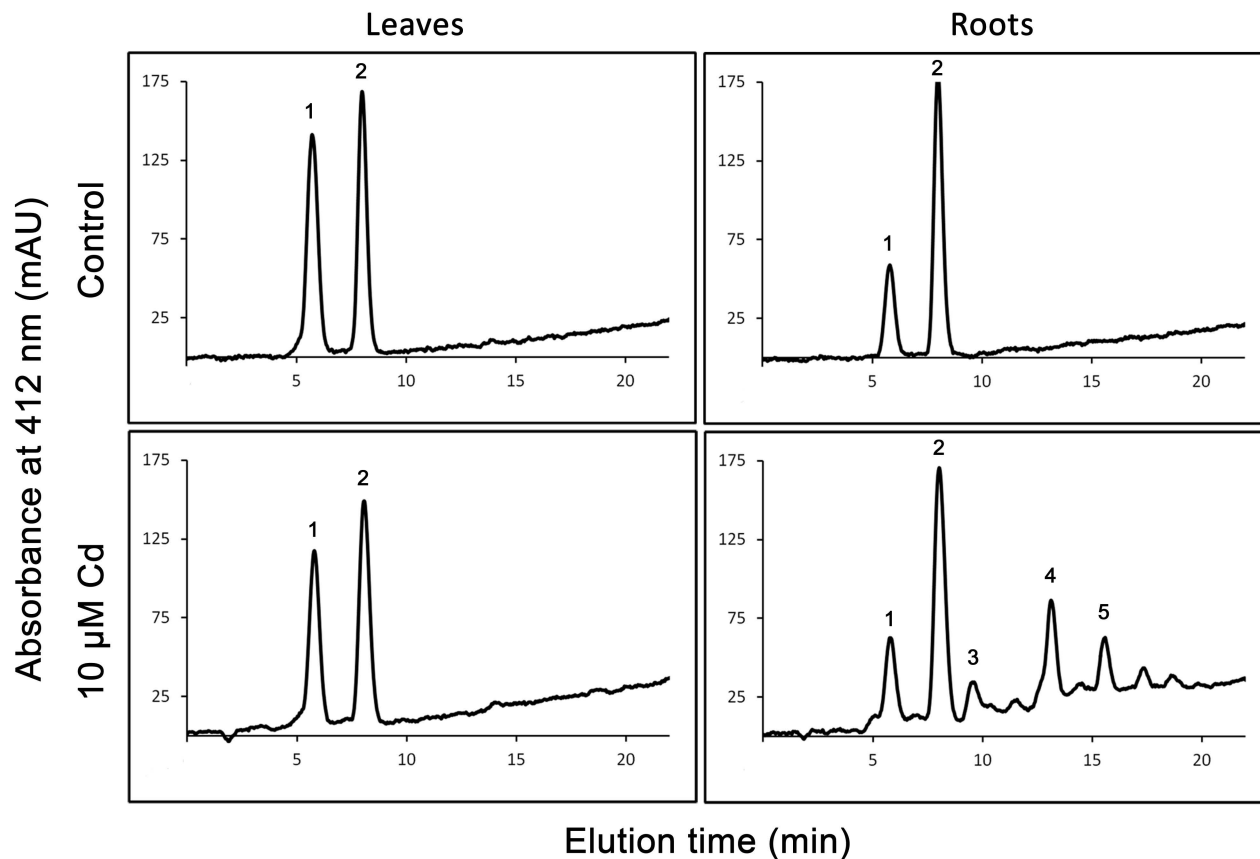

Figure S1. Biothiol profile of peanut plants treated with Cd 0 and 10  $\mu$ M. Peaks were identified by the elution of commercially available standards. Concentration was calculated by the integration of the internal standard N-acetyl-cysteine (Peak 2): GSH (1), PC2 (3). PC3 (4)
